# Supplementary material for: Bonding–antibonding state transition induces multiple electron modulations toward oxygen reduction reaction electrocatalysis
Source: Royal Society of Chemistry journal article supplement (doi:10.1039/d0nj00660b), 2020-01-01
Supplement: d0nj00660b1.pdf [file d0nj00660b1.pdf]

## Supporting Information

### **Bonding-antibonding state transition induces multiple electron modulations toward oxygen reduction reaction electrocatalysis**

Qi Zhang,<sup>a</sup> Haixia Zhong,<sup>b</sup> Can Chen,<sup>a</sup> Juebian Cao,<sup>c</sup> Liwen Yang<sup>a</sup> and Xiaolin Wei<sup>\*,a</sup>

<sup>a</sup> School of Physics and Optoelectronics, Xiangtan University, Hunan, 411105, China.

<sup>b</sup> Faculty of Chemistry and Food Chemistry, Dresden University of Technology, 01062 Dresden, Germany

<sup>c</sup> Hunan Institute of Advanced Sensing and Information Technology, Xiangtan University, Hunan, 411105, China.

\*Corresponding authors. E-mail address: xlw@xtu.edu.cn

## Table of Contents

|                                                                                                                       |      |
|-----------------------------------------------------------------------------------------------------------------------|------|
| Density functional theory calculational details.....                                                                  | S3-5 |
| Fig. S1. Calculated models and the corresponding formation energies.....                                              | S6   |
| Fig. S2. The bond distance .....                                                                                      | S7   |
| Fig. S3. The adsorption free energy of intermediates.....                                                             | S8   |
| Fig. S4. The free energy diagrams for ORR on the Ni-N <sub>4</sub> -2B nanosheet and B-doped graphene nanoribbon..... | S9   |
| Fig. S5. The free energy diagrams for ORR on the Ni-N <sub>3</sub> B. ....                                            | S10  |
| Fig. S6. The calculated models of Ni-N <sub>3</sub> B and its intermediates.....                                      | S11  |
| Fig. S7. The scaling relationship of $\Delta G_{\text{OOH}^*}$ vs $\Delta G_{\text{OH}^*}$ .....                      | S12  |
| Fig. S8. The density of state of B-doped Ni-N <sub>4</sub> structures.....                                            | S13  |
| Table. S1. The ORR catalytic activity of B-doped Ni-N <sub>4</sub> and M-N <sub>x</sub> C.....                        | S14  |
| References. ....                                                                                                      | S15  |

## Calculated Procedures

As shown in **Fig. S1**, a series of B-doped Ni-N<sub>4</sub> nanoribbons were constructed. The B atom locates in the edge of nanoribbon. In Ni-N<sub>4</sub>-2B-2 and Ni-N<sub>4</sub>-B-2, the two-fold coordinated B bonds to one C atom and one N atom. In Ni-N<sub>4</sub>-2B-1, the two-fold coordinated B bonds to two C atoms. Besides, the edged C atoms of all nanoribbons were saturated with hydrogen. The formation energies ( $E_f$ ) of these compounds were calculated to exam their stabilities. The more negative the formation energy means better stability of the compound. And the formation energy was obtained from the following equation:

$$E_f = \frac{E(A_nB_m) - n * E(A) - m * E(B)}{n + m}$$

where  $E(A_nB_m)$  is the total energy of the  $A_nB_m$ ,  $E(A)$  and  $E(B)$  are the normalized energies of corresponding elements A and B, respectively. As shown in **Fig. S1**, the formation energies of these compounds are negative, indicating a good thermodynamic stability.

The 4e<sup>-</sup> ORR process under alkaline condition consists of the formation of OOH\*, O\* and OH\* and the OH\* desorption, corresponding to the four element reactions as following:

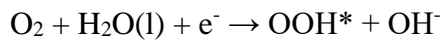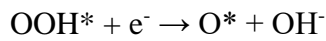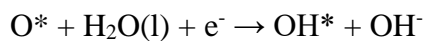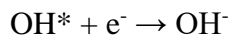

Where \* represents the reaction site. The overall reaction scheme of O<sub>2</sub> reduction to OH<sup>-</sup> in alkaline environment is:

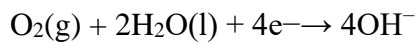

Since it is difficult to obtain the exact free energy of OOH, O, and OH radicals in the electrolyte solution, the adsorption free energy  $\Delta\text{GOOH}^*$ ,  $\Delta\text{GO}^*$ , and  $\Delta\text{GOH}^*$ , which correspond to OOH\*, O\*, and OH\* adsorptions on surface of catalyst are calculated as follows:

$$\Delta\text{GOOH}^* = \text{GOOH@cata} + \text{G}_{\text{H}_2\text{O}(\text{l})} - \text{G}_{\text{cata}} - 3\text{G}_{\text{OH}^-}$$

$$\Delta\text{GO}^* = \text{GO@cata} + \text{G}_{\text{H}_2\text{O}(\text{l})} - \text{G}_{\text{cata}} - 2\text{G}_{\text{OH}^-}$$

$$\Delta\text{GOH}^* = \text{GOH@cata} - \text{G}_{\text{cata}} - \text{G}_{\text{OH}^-}$$

The Gibbs free energy of reactions involving electron/proton transfer was calculated based on the computational hydrogen electrode (CHE) model. The Gibbs free energy difference ( $\Delta\text{G}$ ) of each elementary reaction was given by the following equation:

$$\Delta\text{G}(\text{U}) = \Delta\text{E} - \Delta\text{E}_{\text{ZPE}} + T\Delta\text{S} + \Delta\text{G}_{\text{pH}} + \Delta\text{G}_{\text{U}}$$

where  $\Delta\text{E}$  is the total energy change obtained from DFT calculations,  $\Delta\text{E}_{\text{ZPE}}$  is the change in zero-point energy,  $T$  is temperature (298.15 K) and  $\Delta\text{S}$  is the change in entropy,  $\Delta\text{G}_{\text{pH}} = k_{\text{B}}T \ln 10 \times \text{pH}$ , where  $k_{\text{B}}$  is the Boltzmann constant, and  $\text{pH} = 14$  for 1 M KOH medium,  $\Delta\text{G}_{\text{U}} = -neU$ , where  $U$  is the electrode potential with respect to the normal hydrogen electrode,  $e$  is the transferred electron, and  $n$  is the number of transferred electron.

Hence, the calculated equilibrium potential ( $U_0$ ) for ORR at pH = 14 was 0.4 V vs NHE where the start state and final state are at the same energy level. The applied limited potential ( $U_L$ ) is defined as the applied potential where the whole ORR starts to occur.

$$U_L = \{-\max[\Delta G_{OOH^*}, \Delta G_{O^*} - \Delta G_{OOH^*}, \Delta G_{OH^*} - \Delta G_{O^*}, -4.92 \text{ eV} - \Delta G_{OH^*}]\}/e$$

Then the overpotential is equal to the value of  $U_L$  minus  $U_0$ .

$$\eta = U_0 - U_L$$

The free energy of  $H_2O(l)$  was calculated based on  $G_{H_2O(g)}$  obtained from DFT calculations and derived as  $G_{H_2O(l)} = G_{H_2O(g)} + RT \times \ln(p/p_0)$ , where  $R$  is the ideal gas constant,  $T = 298.15K$ ,  $p = 0.035$  bar, and  $p_0 = 1$  bar. Due to the limitation of DFT calculations in accurately reflecting the true nature of oxygen molecule with high-spin ground state, the  $G_{O_2(g)}$  was derived as  $G_{O_2(g)} = 2G_{H_2O(l)} - 2G_{H_2} - 4.92 \text{ eV}$ .

## Supplementary Figures

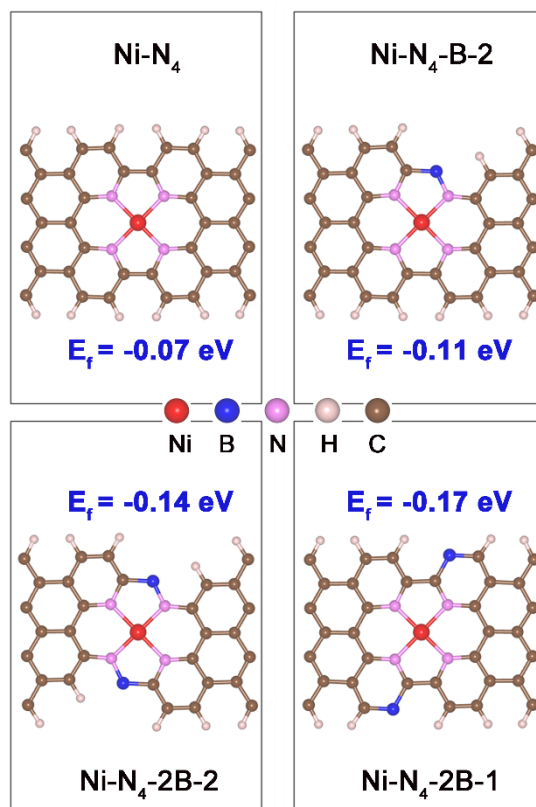

**Fig. S1.** The calculated models and the corresponding formation energies of Ni-N<sub>4</sub> and B doped Ni-N<sub>4</sub>.

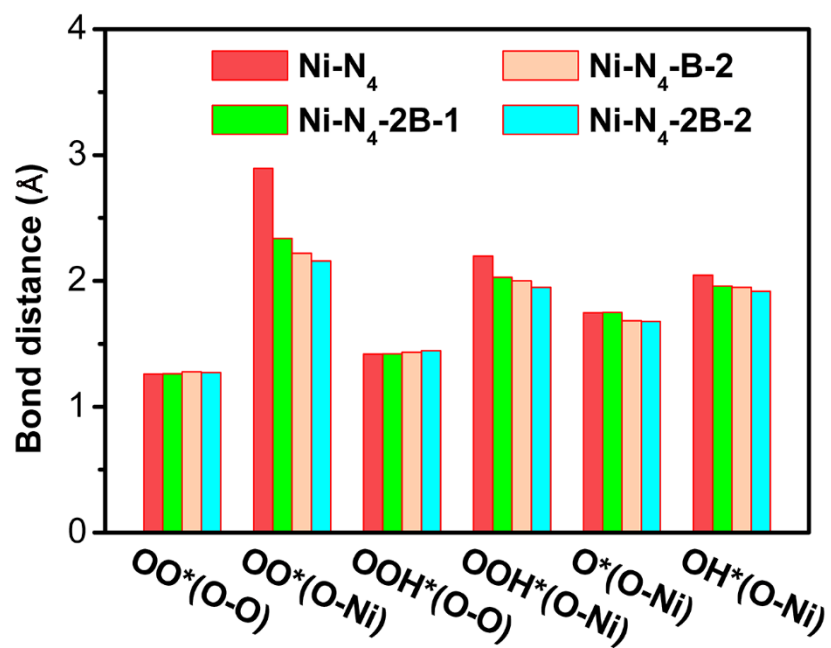

**Fig. S2.** The bond distances of various  $O_xH_y$  for the optimized  $Ni-N_4$  and B doped  $Ni-N_4$ .

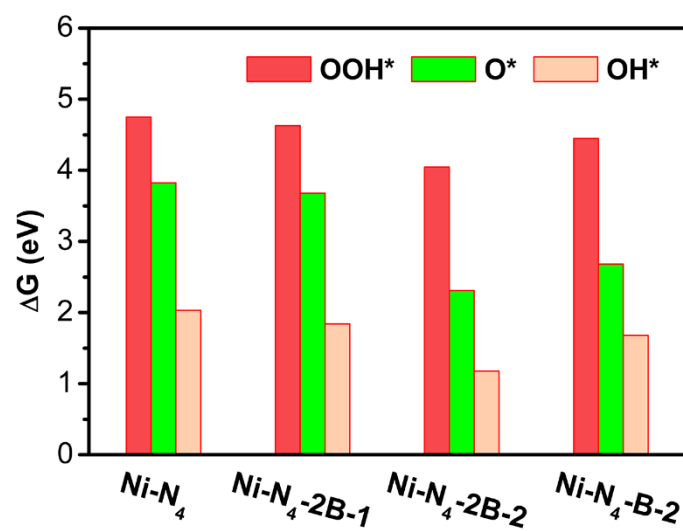

**Fig. S3.** The adsorption free energy of the intermediates (OOH\*, O\* and OH\*) for Ni-N<sub>4</sub> and B doped Ni-N<sub>4</sub>.



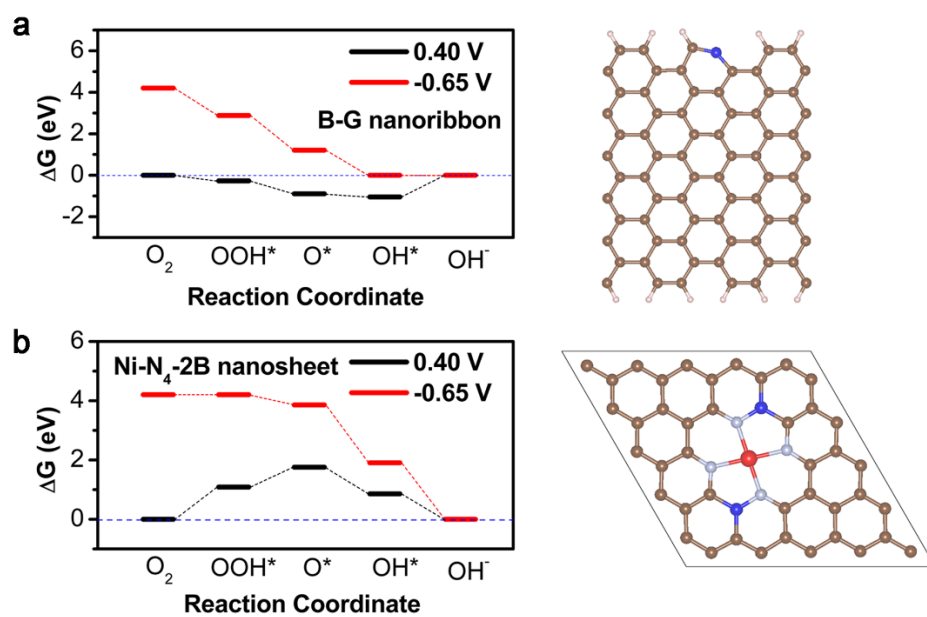

**Fig. S4.** The free energy diagrams for ORR on the Ni-N<sub>4</sub>-2B nanosheet and B-doped graphene nanoribbon.

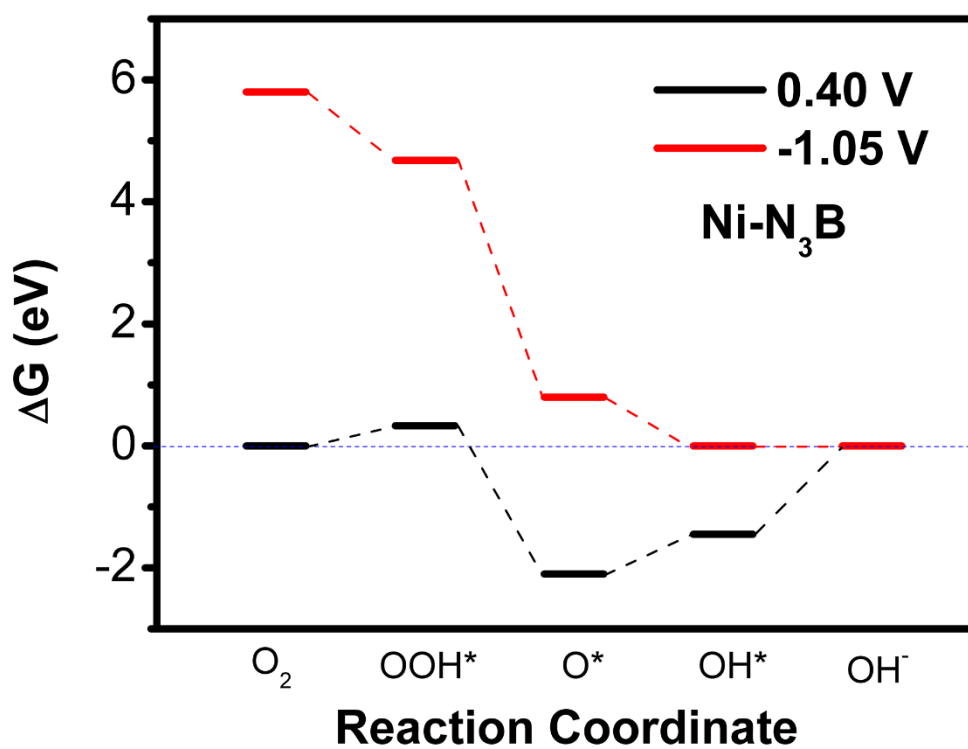

**Fig. S5.** The free energy diagrams for ORR on the Ni-N<sub>3</sub>B.

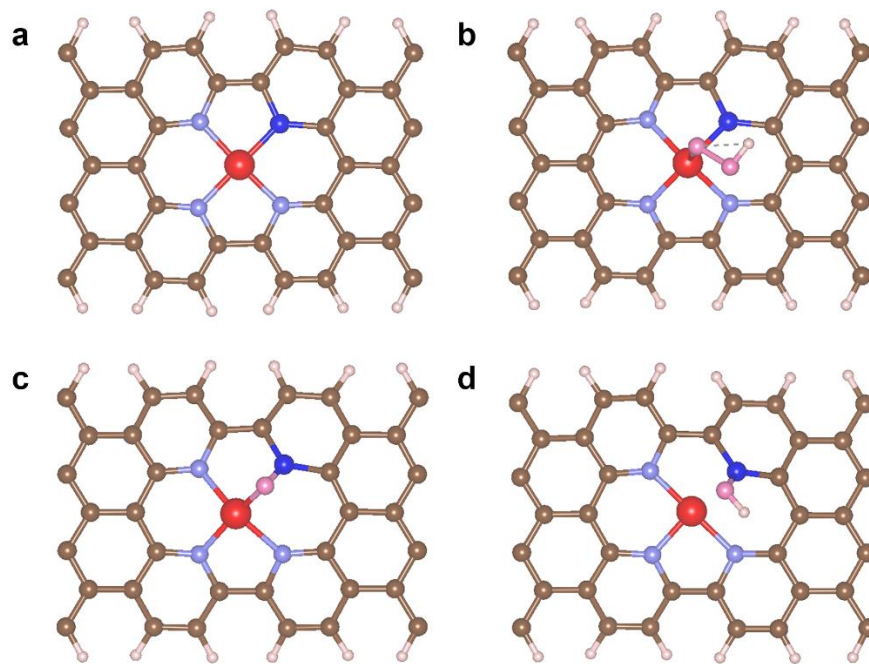

**Fig. S6.** The calculated models of (a) Ni-N<sub>3</sub>B and its intermediates (b-c) toward ORR.

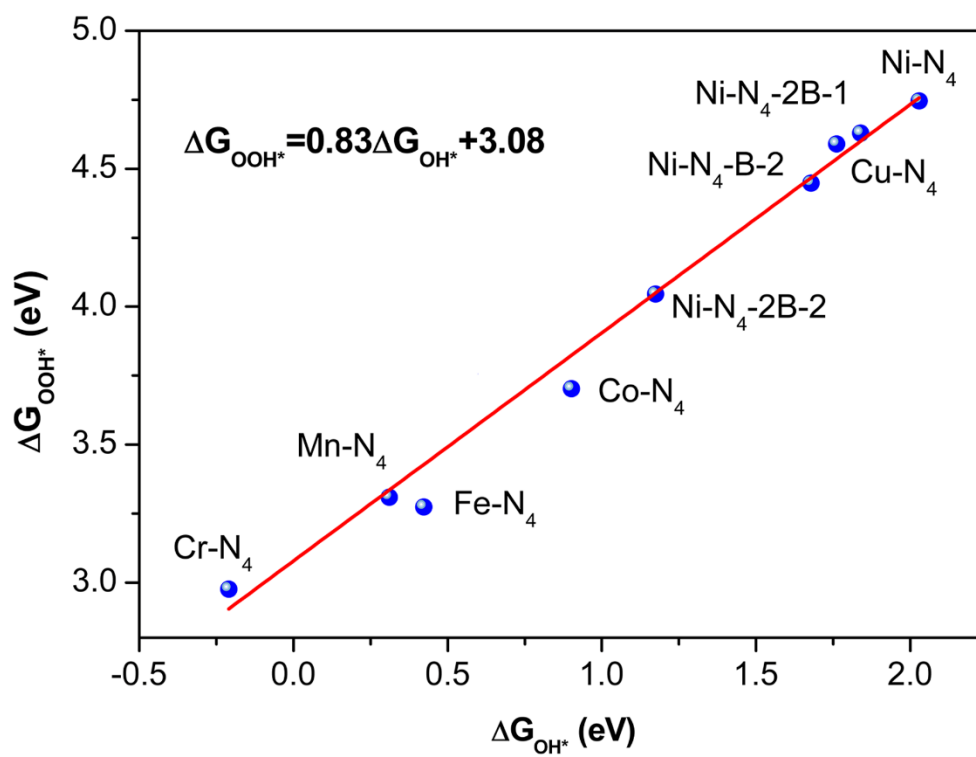

**Fig. S7.** The scaling relations of  $\Delta G_{OOH^*}$  vs  $\Delta G_{OH^*}$  for various M-N<sub>4</sub> structures and B-doped Ni-N<sub>4</sub> structures.

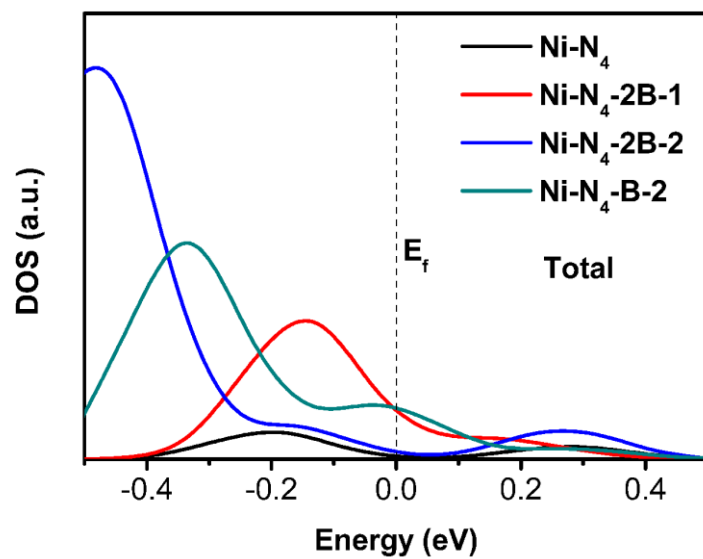

**Fig. S8.** The total DOS of the B-doped  $\text{Ni-N}_4$  systems and  $\text{Ni-N}_4$  structure.

**Table S1.** The ORR catalytic activity of B-doped Ni-N<sub>4</sub> and their similar structures M-N<sub>x</sub>C.

| Materials                           | RDS                                     | Overpotential $\eta$ (V) | References |
|-------------------------------------|-----------------------------------------|--------------------------|------------|
| Ni-N <sub>4</sub>                   | $O_2+*+H_2O+e^- \rightarrow OOH^*+OH^-$ | 1.05                     | This work  |
| Ni-N <sub>4</sub> -B-2              | $O_2+*+H_2O+e^- \rightarrow OOH^*+OH^-$ | 0.75                     |            |
| Ni-N <sub>4</sub> -2B-1             | $O_2+*+H_2O+e^- \rightarrow OOH^*+OH^-$ | 0.94                     |            |
| Ni-N <sub>4</sub> -2B-2             | $O_2+*+H_2O+e^- \rightarrow OOH^*+OH^-$ | 0.35                     |            |
| Ni-N <sub>3</sub> B                 | $OH^*+e^- \rightarrow OH^-+*$           | 1.45                     |            |
| Mn-N <sub>3</sub> -Gra              | $OH^*+e^- \rightarrow OH^-+*$           | 0.56                     | 1          |
| Co-N <sub>3</sub> -Gra              | $OH^*+e^- \rightarrow OH^-+*$           | 0.89                     |            |
| Ni-N <sub>2</sub>                   | $OH^*+e^- \rightarrow OH^-+*$           | 0.43                     | 2          |
| Ni <sub>3</sub> (HITP) <sub>2</sub> | $O_2+*+H_2O+e^- \rightarrow OOH^*+OH^-$ | 0.63                     | 3          |
| Co-N <sub>4</sub> -G                | $O_2+*+H_2O+e^- \rightarrow OOH^*+OH^-$ | 0.82                     | 4          |
| Ni-G                                | $O^*+H_2O+e^- \rightarrow OH^*+OH^-$    | 1.71                     | 5          |
| Si-G                                | $OH^*+e^- \rightarrow OH^-+*$           | 1.98                     |            |
| Au-G                                | $O^*+H_2O+e^- \rightarrow OH^*+OH^-$    | 0.79                     |            |
| Fe-G                                | $OH^*+e^- \rightarrow OH^-+*$           | 1.21                     |            |
| Ag-G                                | $O^*+H_2O+e^- \rightarrow OH^*+OH^-$    | 1.08                     |            |
| Co-G                                | $OH^*+e^- \rightarrow OH^-+*$           | 1.05                     | 6          |
| WN <sub>3</sub>                     | $O^*+H_2O+e^- \rightarrow OH^*+OH^-$    | 1.59                     |            |
| WN <sub>4</sub>                     | $OH^*+e^- \rightarrow OH^-+*$           | 0.58                     |            |
| WN <sub>5</sub>                     | $OH^*+e^- \rightarrow OH^-+*$           | 0.38                     | 7          |
| B-G                                 | $O_2+*+H_2O+e^- \rightarrow OOH^*+OH^-$ | 0.72                     |            |
| Pt (111)                            | $OH^*+e^- \rightarrow OH^-+*$           | 0.45                     | 8          |

## References

- [1] Q. Gao, A DFT study of the ORR on M–N<sub>3</sub> (M = Mn, Fe, Co, Ni, or Cu) co-doped graphene with moiety-patched defects, *Ionics*, (2019), DOI: 10.1007/s11581-019-03376-9.
- [2] S. Kattel, P. Atanassov, B. Kiefer, Density Functional Theory Study of Ni–N<sub>x</sub>/C Electrocatalyst for Oxygen Reduction in Alkaline and Acidic Media, *J. Phys. Chem. C*, 116 (2012) 17378-17383.
- [3] F. Sun, X. Chen, Oxygen reduction reaction on Ni<sub>3</sub>(HITP)<sub>2</sub>: A catalytic site that leads to high activity, *Electrochem. Commun.*, 82 (2017) 89-92.
- [4] M. Xiao, H. Zhang, Y. Chen, J. Zhu, L. Gao, Z. Jin, J. Ge, Z. Jiang, S. Chen, C. Liu, W. Xing, Identification of binuclear Co<sub>2</sub>N<sub>5</sub> active sites for oxygen reduction reaction with more than one magnitude higher activity than single atom CoN<sub>4</sub> site, *Nano Energy*, 46 (2018) 396-403.
- [5] X. Chen, S. Chen, J. Wang, Screening of catalytic oxygen reduction reaction activity of metal-doped graphene by density functional theory, *App. Surf. Sci.*, 379 (2016) 291-295.
- [6] Z. Chen, W. Gong, Z. Liu, S. Cong, Z. Zheng, Z. Wang, W. Zhang, J. Ma, H. Yu, G. Li, W. Lu, W. Ren, Z. Zhao, Coordination-controlled single-atom tungsten as a non-3d-metal oxygen reduction reaction electrocatalyst with ultrahigh mass activity, *Nano Energy*, 60 (2019) 394-403.
- [7] Y. Jiao, Y. Zheng, M. Jaroniec, S.Z. Qiao, Origin of the Electrocatalytic Oxygen Reduction Activity of Graphene-Based Catalysts: A Roadmap to Achieve the Best Performance, *J. Am. Chem. Soc.*, 136 (2014) 4394-4403.
- [8] J.K. Nørskov, J. Rossmeisl, A. Logadottir, L. Lindqvist, J.R. Kitchin, T. Bligaard, H. Jónsson, Origin of the Overpotential for Oxygen Reduction at a Fuel-Cell Cathode, *J. Phys. Chem. B*, 108 (2004) 17886-17892.
